# Supplementary material for: Characterization of AlSi10Mg-CP-Ti Metal/Metal Composite Materials Produced by Electro-Sinter-Forging
Source: MDPI journal article supplement (doi:10.3390/met11101645), 2021-10-17
Supplement: s1 [file s1]

| #  | % voltage | Weight after extraction [g] | Height [mm] | Geometric density [g/cc] | E on sample[J] | V2 max [V] | V2 min [V] | I2 max [kA] |
|----|-----------|-----------------------------|-------------|--------------------------|----------------|------------|------------|-------------|
| 0  | 25        | 2.879                       | 4.065       | 4.06180151               | 3647           | 8.9453125  | -3.3984375 | 39.0625     |
| 1  | 25        | 2.874                       | 4.268       | 3.861890315              | 2576           | 10.546875  | -4.84375   | 21.679688   |
| 2  | 25        | 2.873                       | 4.128       | 3.991475971              | 2578           | 10.507813  | -4.8242188 | 19.238281   |
| 3  | 25        | 2.874                       | 4.021       | 4.099116604              | 2566           | 10.527344  | -4.8242188 | 19.335938   |
| 4  | 25        | 2.87                        | 3.97        | 4.145996888              | 2605           | 10.488281  | -4.8046875 | 20.507813   |
| 5  | 25        | 2.876                       | 4           | 4.123504494              | 2472           | 10.625     | -5.0390625 | 20.703125   |
| 6  | 25        | 2.873                       | 4.018       | 4.100749828              | 2276           | 10.839844  | -5.4492188 | 15.039063   |
| 7  | 25        | 2.873                       | 3.979       | 4.140943154              | 2723           | 10.292969  | -4.5117188 | 22.363281   |
| 8  | 25        | 2.874                       | 3.965       | 4.157010811              | 2836           | 10.039063  | -4.2578125 | 24.804688   |
| 9  | 25        | 2.867                       | 3.96        | 4.152121839              | 2915           | 9.8828125  | -4.1015625 | 25.878906   |
| 10 | 25        | 2.874                       | 3.972       | 4.14968476               | 2980           | 9.8046875  | -3.9648438 | 29.101563   |
| 11 | 25        | 2.876                       | 3.971       | 4.153618226              | 2813           | 10.078125  | -4.296875  | 23.925781   |
| 12 | 30        | 2.869                       | 3.942       | 4.173991017              | 3314           | 11.835938  | -5.1171875 | 29.394531   |
| 13 | 30        | 2.872                       | 3.92        | 4.20180555               | 3345           | 11.796875  | -5.0390625 | 30.371094   |
| 14 | 35        | 2.879                       | 3.931       | 4.200260275              | 3955           | 13.320313  | -5.5859375 | 38.867188   |
| 15 | 35        | 2.869                       | 3.916       | 4.20170393               | 3924           | 13.398438  | -5.5859375 | 37.207031   |
| 16 | 35        | 2.873                       | 3.931       | 4.191506693              | 3973           | 13.339844  | -5.5859375 | 37.5        |
| 17 | 35        | 2.872                       | 3.927       | 4.1943157                | 3968           | 13.378906  | -5.5859375 | 37.792969   |
| 18 | 35        | 2.87                        | 3.929       | 4.189261299              | 3996           | 13.320313  | -5.5664063 | 37.792969   |
| 19 | 35        | 2.872                       | 3.926       | 4.195384044              | 3981           | 13.339844  | -5.5664063 | 37.597656   |

| I2 min [kA] | P start [MPa] | P max up [MPa] | P max down [MPa] | P max [MPa] | E [J]     | SEI [J/g]   | Current density [kA/mm2] |
|-------------|---------------|----------------|------------------|-------------|-----------|-------------|--------------------------|
| -14.746094  |               | 197            | 157              | 177         | 5529.6    | 1266.759291 | 0.499354618              |
| -18.9453125 | 50            | 17             | 44               | 30.5        | 5529.6    | 896.3117606 | 0.277141813              |
| -15.234375  | 50            | 113            | 95               | 104         | 5529.6    | 897.3198747 | 0.245932153              |
| -16.015625  | 50            | 227            | 187              | 207         | 5529.6    | 892.8322895 | 0.247180536              |
| -25.4882815 | 50            | 307            | 280              | 293.5       | 5529.6    | 907.6655052 | 0.262161175              |
| -16.308594  | 30            | 320            | 279              | 299.5       | 5529.6    | 859.527121  | 0.264657948              |
| -16.2109375 | 15            | 322            | 279              | 300.5       | 5529.6    | 792.2032718 | 0.192251528              |
| -15.625     | 60            | 316            | 271              | 293.5       | 5529.6    | 947.7897668 | 0.285880522              |
| -17.1875    | 70            | 308            | 278              | 293         | 5529.6    | 986.7780097 | 0.317090183              |
| -15.917969  | 80            | 313            | 273              | 293         | 5529.6    | 1016.742239 | 0.330822438              |
| -16.2109375 | 90            | 311            | 277              | 294         | 5529.6    | 1036.882394 | 0.166899059              |
| -15.7226565 | 70            | 312            | 278              | 295         | 5529.6    | 978.0945758 | 0.137215671              |
| -17.3828125 | 70            | 314            | 271              | 292.5       | 7962.624  | 1155.106309 | 0.168579253              |
| -17.2851565 | 70            | 314            | 270              | 292         | 7962.624  | 1164.693593 | 0.174179892              |
| -20.5078125 | 70            | 310            | 276              | 293         | 10838.016 | 1373.740882 | 0.222905455              |
| -19.53125   | 70            | 302            | 271              | 286.5       | 10838.016 | 1367.723946 | 0.213384369              |
| -21.1914065 | 70            | 305            | 271              | 288         | 10838.016 | 1382.875044 | 0.21506456               |
| -19.140625  | 70            | 302            | 271              | 286.5       | 10838.016 | 1381.615599 | 0.216744753              |
| -18.9453125 | 70            | 303            | 271              | 287         | 10838.016 | 1392.334495 | 0.216744753              |
| -19.2382815 | 70            | 306            | 272              | 289         | 10838.016 | 1386.142061 | 0.215624625              |
